# Supplementary material for: Intrinsic type-II van der Waals heterostructures based on graphdiyne and XSSe (X = Mo, W): a first-principles study
Source: Royal Society of Chemistry journal article supplement (doi:10.1039/d2cp02801h), 2022-01-01
Supplement: d2cp02801h1.pdf [file d2cp02801h1.pdf]

**Supplementary Information For**  
**Intrinsic type-II van der waals heterostructures based on graphdiyne**  
**and XSe (X=Mo, W): a first-principles study**

Junhao Peng,<sup>‡a</sup> Chuyu Li,<sup>‡a</sup> Huafeng Dong,<sup>\*ab</sup> Fugen Wu.<sup>bc</sup>

<sup>a</sup>School of Physics and Optoelectronic Engineering, Guangdong University of Technology,  
Guangzhou 510006, China

<sup>b</sup>Guangdong Provincial Key Laboratory of Information Photonics Technology, Guangdong  
University of Technology, Guangzhou 510006, China

<sup>c</sup>School of Materials and Energy, Guangdong University of Technology, Guangzhou 510006,  
China

<sup>‡</sup>Contributed equally.

<sup>\*</sup>Corresponding author: hfdong@gdut.edu.cn (H.Dong)

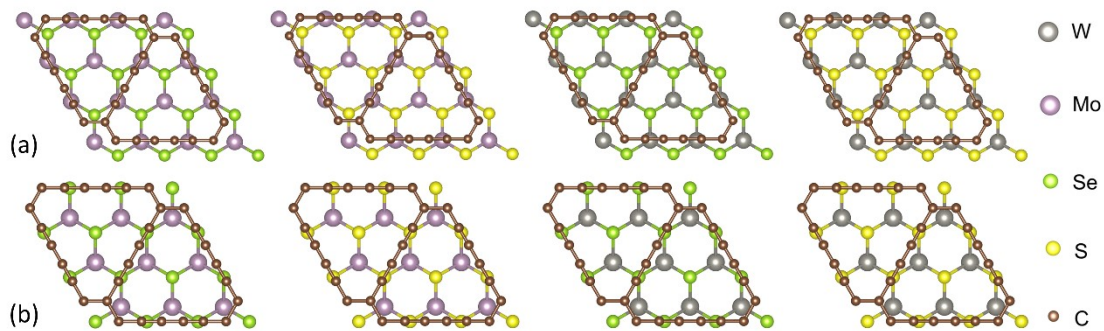

Figure S1. Top view of two stacking configurations of G@SeMoS, G@SMoSe, G@SeWS, and G@SWSe heterostructures, respectively. (a) pattern-ii (b) pattern-iii

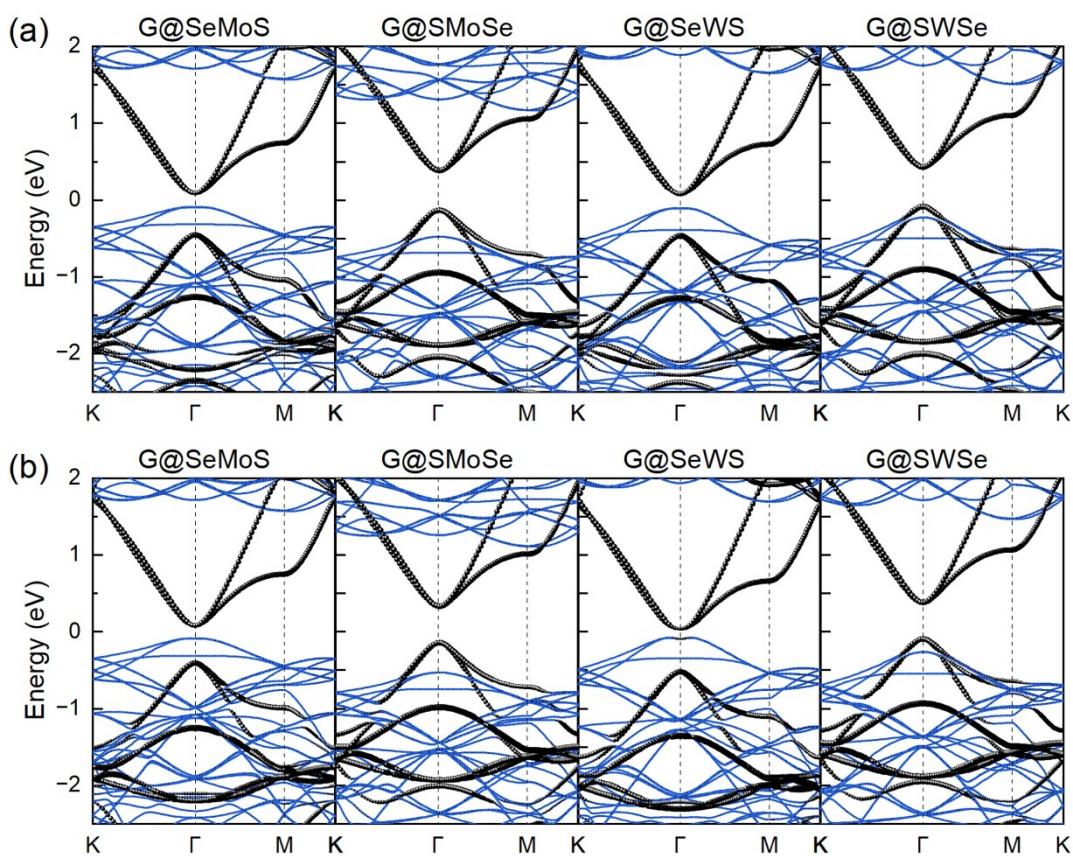

Figure S2. (a) Band structures of pattern-ii G@SeMoS, G@SMoSe, G@SeWS, and G@SWSe heterostructures, respectively. (b) Band structures of pattern-iii G@SeMoS, G@SMoSe, G@SeWS, and G@SWSe heterostructures, respectively. The black dots and blue lines in the band structures represent the projected band of GDY and XSSe (X=Mo,W), respectively.
